# Supplementary material
Source: Elsevier journal article supplement (https://www.sciencedirect.com/science/article/pii/S0021755719303869)
Supplement: mmc1 [file S0021755719303869:mmc1.doc]

**JPED_2019_327 – Supplementary Material**

**Material suplementar. Versão final do instrumento QCPA**

| **QUESTIONÁRIO DE CONHECIMENTO E PRÁTICA ALIMENTARES - QCPA** |
| --- |

| Nº | **PARA CADA PERGUNTA ABAIXO, MARQUE UM “X” NA COLUNA QUE MAIS MOSTRA COMO VOCÊ SE ALIMENTA.** | **QUASE**  **SEMPRE**  **(5 a 7 vezes por semana)** | **MUITAS VEZES**  **(4 a 3 vezes por semana)** | **POUCAS VEZES**  **(2 a 1 vez por semana)** | **QUASE NUNCA**  **(1 a 3 vezes POR MÊS)** |
| --- | --- | --- | --- | --- | --- |
| **1** | VOCÊ COME ARROZ COM FEIJÃO OU LENTILHA? |  |  |  |  |
| **2** | VOCÊ AJUDA SEUS PAIS A FAZER COMPRAS EM MERCADOS OU FEIRAS DE FRUTAS E VERDURAS? |  |  |  |  |
| **3** | VOCÊ COME PIZZA, HAMBÚRGUER, CACHORRO-QUENTE*,* BATATA FRITA OU BOLACHA RECHEADA? |  |  |  |  |
| **4** | VOCÊ COME PEIXE OU FRANGO? |  |  |  |  |
| **5** | VOCÊ COME DOCES? (SORVETE, BALAS, CHOCOLATE, GELATINA, PUDIM, DOCINHOS) |  |  |  |  |
| **6** | VOCÊ COLOCA SAL NO SEU PRATO QUANDO ESTÁ À MESA? |  |  |  |  |
| **7** | VOCÊ GOSTA DE TOMAR LEITE PURO? |  |  |  |  |
| **8** | VOCÊ COME CENOURA OU COUVE REFOGADA OU BRÓCOLIS OU ESPINAFRE OU OUTROS LEGUMES? |  |  |  |  |
| **9** | VOCÊ ASSISTE TV, MEXE NO CELULAR, *TABLET* OU COMPUTADOR DURANTE AS REFEIÇÕES? |  |  |  |  |
| **10** | VOCÊ COZINHA OU AJUDA SEUS PAIS A COZINHAR EM CASA? |  |  |  |  |
| **11** | VOCÊ COME A COMIDA DA ESCOLA? |  |  |  |  |
| **12** | VOCÊ COME FRUTAS? (BANANA OU MAÇÃ OU LARANJA OU MELÃO OU OUTRA FRUTA)? |  |  |  |  |
| **13** | VOCÊ COME SALADA (ALFACE OU TOMATE OU BETERRABA OU CENOURA OU OUTRA SALADA)? |  |  |  |  |
| **14** | VOCÊ COME RÁPIDO? |  |  |  |  |
| **15** | VOCÊ COSTUMA LER RECEITAS DE COMIDAS? |  |  |  |  |
| **16** | VOCÊ TOMA ÁGUA? |  |  |  |  |
| **17** | VOCÊ TOMA SUCO EM PÓ DE PACOTINHO OU REFRIGERANTE? |  |  |  |  |
| **18** | VOCÊ AJUDA SEUS PAIS A PLANEJAR AS COMPRAS DE ALIMENTOS? |  |  |  |  |

**NOME:** ....................................................................................... **SEXO:** ( ) MENINO ( )MENINA **IDADE...........**

**DATA DE NASCIMENTO:** .........../.........../.......... **TURMA/SÉRIE:** .................. **ESCOLA**: ( ) PÚBLICA ( )PARTICULAR
